# Supplementary material
Source: publisher figshare collection journal article supplement (https://acs.figshare.com/ndownloader/files/4677313)
Supplement: Supplementary file 1 [file 4677313]

## **SUPPORTING INFORMATION**

Kinetic characterization of adenylosuccinate synthetase from the thermophilic archaea

*Methanocaldococcus jannaschii*

Sonali Mehrotra and Hemalatha Balaram

Molecular Biology and Genetics Unit, Jawaharlal Nehru Centre for Advanced Scientific

Research, Jakkur Post, Bangalore 560064, India.

Corresponding author. Hemalatha Balaram

Telephone: 91-80-22082812,

Fax: 91-08-22082766,

E-mail. [hb@jncasr.ac.in](mailto:hb@jncasr.ac.in).

Figure S1.

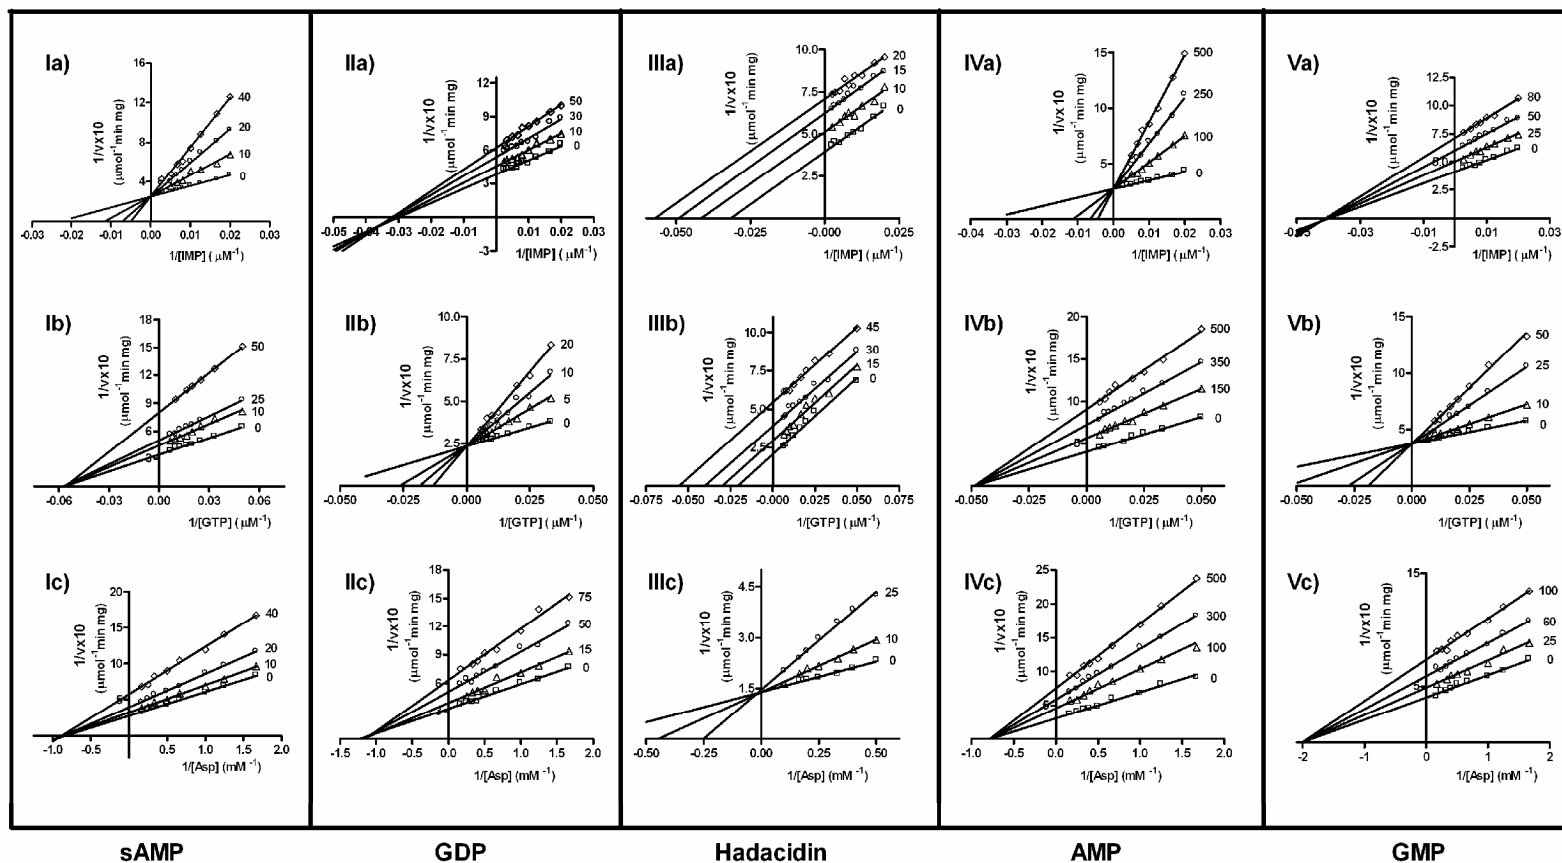

**Figure S1.** Lineweaver-Burk plots for inhibition of MjAdSS by products and substrate analogs; I) adenylosuccinate (sAMP), II) GDP, III) Hadacidin, IV) AMP and V) GMP. The micromolar concentrations of inhibitors are indicated against each line. Ia) GTP and aspartate were held constant at 80  $\mu$ M and 4.5 mM respectively, and IMP was varied from 50 to 375  $\mu$ M; Ib) Aspartate and IMP were held constant at 4.5 mM and 100  $\mu$ M respectively, and GTP was varied from 20 to 150  $\mu$ M; Ic) IMP and GTP were held constant at 150  $\mu$ M and 80  $\mu$ M respectively, and aspartate was varied from 0.6 mM to 6 mM. IIa) Aspartate and GTP were held constant at 1.5 mM and 60  $\mu$ M respectively, and IMP was varied from 50  $\mu$ M to 400  $\mu$ M; IIb) Aspartate and IMP were held constant at 5.4 mM and 100  $\mu$ M respectively, and GTP was varied from 20  $\mu$ M to 175  $\mu$ M; IIc) IMP and GTP were held constant at 100  $\mu$ M and 80  $\mu$ M respectively, and aspartate was varied from 0.6 mM to 6.0 mM. IIIa) Aspartate and GTP were held constant at 1.5 mM and 60  $\mu$ M respectively, and IMP was varied from 50  $\mu$ M to 400  $\mu$ M; IIIb) Aspartate and IMP were held constant at 3.6 mM and 375  $\mu$ M respectively, and GTP was varied from 20  $\mu$ M to 150  $\mu$ M; IIIc) IMP and GTP were held constant at 500  $\mu$ M and 250  $\mu$ M respectively, and aspartate was varied from 2 mM to 10 mM. IVa) Aspartate and GTP were held constant at 4.5 mM and 80  $\mu$ M respectively, and IMP was varied from 50  $\mu$ M to 350  $\mu$ M; IVb) Aspartate and IMP were held constant at 1.5 mM and 100  $\mu$ M respectively, and GTP was varied from 20  $\mu$ M to 175  $\mu$ M; IVc) IMP and GTP were held constant at 100  $\mu$ M and 80  $\mu$ M respectively, and aspartate was varied from 0.6 mM to 6 mM. Va) Aspartate and GTP were held constant at 1.8 mM and 80  $\mu$ M respectively, and IMP was varied from 50  $\mu$ M to 375  $\mu$ M; Vb) Aspartate and IMP were held constant at 4.5 mM and 100  $\mu$ M respectively, and GTP was varied from 20

$\mu\text{M}$  to  $150\ \mu\text{M}$ ; Vc) IMP and GTP were held constant at  $150\ \mu\text{M}$  and  $80\ \mu\text{M}$  respectively, and aspartate was varied from  $0.6\ \text{mM}$  to  $6.0\ \text{mM}$ .

Figure S2.

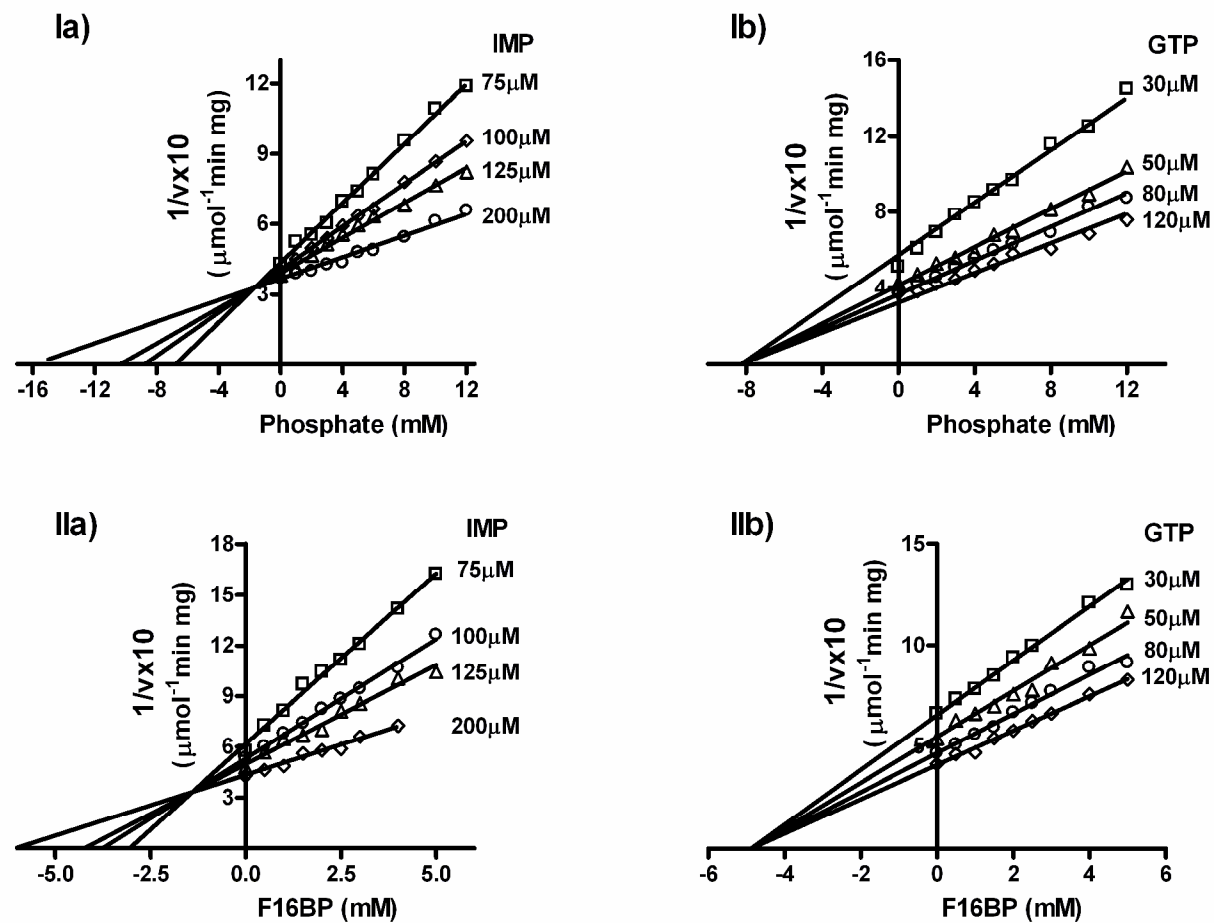

**Figure S2.** I) Dixon analysis of the inhibition of MjAdSS by Pi. Ia) Aspartate and GTP were held constant at 2 mM and 80  $\mu$ M, respectively. The fixed concentration of IMP is indicated against each plot. Ib) Aspartate and IMP were held constant at 2 mM and 150  $\mu$ M, respectively. Fixed concentration of GTP is indicated against each plot.

II) Dixon analysis of effect of F16BP on enzyme activity. IIa) Aspartate and GTP were kept constant at 2 mM and 80  $\mu$ M, respectively. Fixed concentrations of IMP appear against each line. IIb) Aspartate and IMP were held constant at 2 mM and 150  $\mu$ M, respectively. Fixed concentration of GTP is indicated against each plot.
